# Supplementary material for: RNA editing in nascent RNA affects pre-mRNA splicing
Source: Genome Res. 2018 Jun;28(6):812–23. doi: 10.1101/gr.231209.117 (PMC5991522; doi:10.1101/gr.231209.117)
Supplement: Supplemental Material [file supp_gr.231209.117_Supplemental_Table_S1.xlsx]

## Sheet: Table S1
Supplemental Table S1. U87MG subcellular fractionation RNA-Seq, summary of mapping statistics. Replicates are named as, for example, ChA-(1), ChA-(2), ChA-(3). Numbers shown refer to numbers of read pairs (paired-end RNA-Seq).
Fraction	unmapped	multi-mapped	unique-mapped	TotalPair	%unique-mapped
ChA-(1)	20046413	67511144	24480868	112038425	0.218504
ChA-(2)	8403351	55711940	43734978	107850269	0.405516
ChA-(3)	11186107	65406553	40661293	117253953	0.34678
ChA+(1)	11486087	19006498	58125293	88617878	0.655909
ChA+(2)	5900865	13164027	67734030	86798922	0.780356
ChA+(3)	9374493	18209654	87364629	114948776	0.760031
NpA+(1)	8895476	23465019	33100159	65460654	0.50565
NpA+(2)	5987235	30553104	60297208	96837547	0.622664
NpA+(3)	11172405	33730556	62865681	107768642	0.583339
CpA+(1)	12202971	30330828	53996321	96530120	0.559373
CpA+(2)	6588287	29171371	54506821	90266479	0.603843
CpA+(3)	9699159	35504823	58039161	103243143	0.56216
Total	120942849	421765517	644906442	1187614808	0.543027
