# Supplementary material for: RNA editing in nascent RNA affects pre-mRNA splicing
Source: Genome Res. 2018 Jun;28(6):812–23. doi: 10.1101/gr.231209.117 (PMC5991522; doi:10.1101/gr.231209.117)
Supplement: Supplemental Material [file supp_gr.231209.117_Supplemental_Table_S2.xlsx]

## Sheet: Table S2
Supplemental Table S2. Number of editing sites detected in the U87MG subcellular fractions
Type	ChA-	ChA+	NpA+	CpA+
A.to.C	1951	1331	289	296
A.to.G	151141	304912	67656	74419
A.to.T	16107	9624	1426	1623
C.to.A	5062	3279	461	643
C.to.G	3863	2528	387	551
C.to.T	11293	13451	3469	3907
G.to.A	4272	4960	1313	1661
G.to.C	8929	5319	871	998
G.to.T	13308	9042	1776	1352
T.to.A	11390	7152	906	1206
T.to.C	3443	4223	1834	2121
T.to.G	2228	1437	229	305
% A.to.G	0.64871	0.830239	0.839227	0.835399
% C.to.T	0.0484705	0.0366255	0.0430306	0.0438585
