# Supplementary material for: RNA editing in nascent RNA affects pre-mRNA splicing
Source: Genome Res. 2018 Jun;28(6):812–23. doi: 10.1101/gr.231209.117 (PMC5991522; doi:10.1101/gr.231209.117)
Supplement: Supplemental Material [file supp_gr.231209.117_Supplemental_Table_S3.xlsx]

## Sheet: Table S3
Supplemental Table S3. Numbers of editing sites of different kinetic groups in U87MG cells. An editing site could be "v": edited, "x": unedited, "-": undetermined in a specific fraction. Kinetic group label "?" denotes cases with ambiguous kinetic interpretation, thus excluded from the 4 groups. Results for k = 5, 10, and 20 are shown.
ChA-|ChA+|NpA+|CpA+	k = 5	k = 10	k = 20	kinetic groups
-|-|-|v	1075	2447	5126	?
-|-|v|-	873	1938	3972	?
-|-|v|v	646	1606	3352	?
-|-|v|x	96	157	149	?
-|-|x|v	132	150	79	?
-|v|-|-	56919	81479	92928	?
-|v|-|v	6385	11664	15901	?
-|v|-|x	651	245	73	?
-|v|v|-	6551	11114	14547	?
-|v|v|v	12617	19953	24732	?
-|v|v|x	1366	1000	343	?
-|v|x|-	619	150	31	?
-|v|x|v	1607	1124	390	?
-|v|x|x	436	157	33	?
-|x|-|v	1660	3025	3047	?
-|x|v|-	1293	2099	1976	?
-|x|v|v	2406	2818	1971	?
-|x|v|x	1227	842	218	?
-|x|x|v	1409	924	227	?
v|-|-|-	7461	15524	23192	group 1
v|-|-|v	192	566	1379	group 1
v|-|-|x	17	22	12	?
v|-|v|-	139	452	1010	group 1
v|-|v|v	99	303	765	group 1
v|-|v|x	5	10	12	?
v|-|x|-	13	6	2	?
v|-|x|v	10	11	8	?
v|-|x|x	6	4	3	?
v|v|-|-	121020	125396	126055	group 1
v|v|-|v	24186	27088	28189	group 1
v|v|-|x	1844	300	60	?
v|v|v|-	24147	26573	27358	group 1
v|v|v|v	48763	48763	48763	group 1
v|v|v|x	3526	1100	315	?
v|v|x|-	2149	267	32	?
v|v|x|v	4306	1404	303	?
v|v|x|x	1196	246	62	?
v|x|-|-	17856	10520	3050	?
v|x|-|v	1650	1651	1008	?
v|x|-|x	382	99	22	?
v|x|v|-	1168	1123	675	?
v|x|v|v	1521	1317	855	?
v|x|v|x	435	162	50	?
v|x|x|-	286	52	17	?
v|x|x|v	612	236	69	?
v|x|x|x	359	153	82	?
x|-|-|v	47	62	52	?
x|-|v|-	36	29	35	?
x|-|v|v	25	27	12	?
x|-|v|x	8	4	2	?
x|-|x|v	13	1	0	?
x|v|-|-	34123	12790	1940	group 2
x|v|-|v	6425	4026	1263	group 2
x|v|-|x	857	72	4	?
x|v|v|-	5487	3163	952	group 2
x|v|v|v	13795	6459	1680	group 2
x|v|v|x	2490	617	52	?
x|v|x|-	860	62	0	?
x|v|x|v	3224	827	87	?
x|v|x|x	547	57	3	?
x|x|-|v	2781	2406	1072	?
x|x|v|-	1653	1545	784	group 3
x|x|v|v	2524	1150	266	group 3
x|x|v|x	2040	612	90	?
x|x|x|v	2570	672	84	group 4
