# Supplementary material for: RNA editing in nascent RNA affects pre-mRNA splicing
Source: Genome Res. 2018 Jun;28(6):812–23. doi: 10.1101/gr.231209.117 (PMC5991522; doi:10.1101/gr.231209.117)
Supplement: Supplemental Material [file supp_gr.231209.117_Supplemental_Table_S4.xlsx]

## Sheet: Table S4
Supplemental Table S4. Recoding sites identified in the U87MG data
chromosome	hg19 position (1-based)	strand	context	gene	MZ score	kinetic group
chr1	160302244	-	CDS	COPA	0.164692	1
chr13	46090371	+	CDS	COG3	0.746985	1
chr20	36148080	-	intron	BLCAP	0.756297	1
chrX	122598962	+	CDS	GRIA3	0.39067	1
chr6	150093334	+	intron	PCMT1	0.373777	not categorized
