# Supplementary material for: RNA editing in nascent RNA affects pre-mRNA splicing
Source: Genome Res. 2018 Jun;28(6):812–23. doi: 10.1101/gr.231209.117 (PMC5991522; doi:10.1101/gr.231209.117)
Supplement: Supplemental Material [file supp_gr.231209.117_Supplemental_Table_S5.xlsx]

## Sheet: Table S5
Supplemental Table S5. U87MG editing sites in splice site regions (Fig. 3A). 3'ss: 3' splice site; 5'ss: 5' splice site; i: intron; e: exon. The number before i and e represent the numbers of nucleotides away from the exon-intron boundaries.
hg19 position (1-based)	location in splice sites	MaxEnt ∆score (G-A)
chrX.9660151.+	3'ss.2i	-7.95
chrX.79942504.-	3'ss.2i	-7.95
chrX.70602384.+	3'ss.2i	-7.96
chrX.70517225.+	3'ss.2i	-7.96
chrX.70510477.+	3'ss.2i	-7.96
chrX.69637736.+	3'ss.2i	-7.96
chrX.65835874.-	3'ss.2i	-7.96
chrX.54577394.+	3'ss.2i	-7.95
chrX.44918490.+	3'ss.2i	-7.95
chrX.30714732.+	3'ss.2i	-7.95
chrX.30714157.+	3'ss.2i	-7.96
chrX.30709238.+	3'ss.2i	-7.95
chrX.30695490.+	3'ss.2i	-7.95
chrX.30686127.+	3'ss.2i	-7.95
chrX.154344330.+	3'ss.2i	-7.96
chrX.137939843.-	3'ss.2i	-7.95
chrX.123025086.+	3'ss.2i	-7.95
chrX.122598962.+	5'ss.2e	-2.86
chrX.118602592.+	5'ss.3i	-0.92
chr9.99735232.-	3'ss.2i	-7.96
chr9.99681110.-	3'ss.2i	-7.96
chr9.99589465.-	3'ss.2i	-7.95
chr9.99525497.-	3'ss.2i	-7.95
chr9.97177438.+	3'ss.2i	-7.96
chr9.77692498.-	3'ss.2i	-7.96
chr9.40789325.-	3'ss.2i	-7.96
chr9.19059001.-	3'ss.2i	-7.95
chr9.154795.-	3'ss.1e	1.18
chr9.133729627.+	5'ss.3i	-3.87
chr9.132612206.+	5'ss.3i	-1.15
chr9.114798271.-	5'ss.4i	0.05
chr9.100998316.-	3'ss.2i	-7.95
chr9.100998314.-	3'ss.1e	1.66
chr8.94717135.+	3'ss.2i	-7.95
chr8.87443842.+	3'ss.2i	-7.96
chr8.87437450.+	3'ss.2i	-7.95
chr8.86193759.+	3'ss.2i	-7.95
chr8.82572904.-	3'ss.2i	-7.96
chr8.74868291.-	3'ss.2i	-7.95
chr8.38684684.+	3'ss.2i	-7.96
chr8.25294003.-	3'ss.2i	-7.96
chr8.145583281.+	3'ss.2i	-7.95
chr8.145583281.+	5'ss.2e	-5.54
chr8.145318816.-	3'ss.2i	-7.96
chr8.144672907.-	3'ss.2i	-7.96
chr8.144672907.-	3'ss.2e	1.33
chr8.124269274.-	5'ss.2e	-1.36
chr8.124269269.-	5'ss.4i	-1.12
chr8.11721974.-	3'ss.2i	-7.95
chr8.11721974.-	5'ss.2e	-4.72
chr8.11712186.-	5'ss.3i	-4.23
chr7.99955841.+	3'ss.2i	-7.95
chr7.99952239.+	3'ss.2i	-7.96
chr7.99952239.+	5'ss.2e	-3.07
chr7.99264690.-	3'ss.2i	-7.96
chr7.87507366.+	3'ss.2i	-7.95
chr7.84001218.-	3'ss.2i	-7.95
chr7.76180735.+	3'ss.2i	-7.96
chr7.75155294.-	3'ss.2i	-7.95
chr7.75104150.-	3'ss.2i	-7.96
chr7.75044868.+	3'ss.2i	-7.95
chr7.75044396.+	3'ss.2i	-7.95
chr7.72297566.-	3'ss.2i	-7.95
chr7.66463050.+	3'ss.2i	-7.95
chr7.66248657.+	3'ss.2i	-7.95
chr7.66180748.+	3'ss.2i	-7.95
chr7.66019826.-	3'ss.2i	-7.96
chr7.65941316.-	3'ss.2i	-7.96
chr7.65895006.-	3'ss.2i	-7.95
chr7.65874233.-	3'ss.2i	-7.95
chr7.65432896.-	3'ss.2i	-7.96
chr7.64378573.+	3'ss.2i	-7.96
chr7.64152241.+	3'ss.2i	-7.96
chr7.5360823.-	3'ss.2i	-7.96
chr7.5015930.+	3'ss.2i	-7.96
chr7.45798775.-	3'ss.2i	-7.96
chr7.45796593.-	3'ss.2i	-7.96
chr7.45102817.+	5'ss.3i	-2.9
chr7.44053280.-	3'ss.2i	-7.96
chr7.44005996.-	3'ss.2i	-7.96
chr7.38389945.+	3'ss.2i	-7.95
chr7.35919431.+	3'ss.2i	-7.96
chr7.35903160.+	3'ss.2i	-7.95
chr7.35163692.-	3'ss.2i	-7.95
chr7.35161222.-	3'ss.2i	-7.96
chr7.34994392.-	3'ss.2i	-7.95
chr7.33054445.-	3'ss.2i	-7.95
chr7.2564851.+	3'ss.2i	-7.96
chr7.23441859.-	5'ss.5i	2.1
chr7.22534507.-	3'ss.2i	-7.95
chr7.19394512.+	5'ss.4i	-5.47
chr7.143573717.-	3'ss.2i	-7.96
chr7.143530975.-	3'ss.2e	0.97
chr7.140400501.+	5'ss.5i	4.08
chr7.140400023.+	5'ss.5i	4.17
chr7.140173571.-	5'ss.4i	-1.69
chr7.140154531.-	3'ss.2i	-7.96
chr7.128255912.+	3'ss.2i	-7.95
chr7.111644188.-	3'ss.2i	-7.96
chr7.111644188.-	3'ss.1i	8.75
chr7.103003131.+	3'ss.2i	-7.96
chr7.102306612.-	3'ss.2i	-7.96
chr7.102207532.-	3'ss.2i	-7.96
chr7.102182111.-	3'ss.2i	-7.96
chr7.102147273.-	3'ss.2i	-7.95
chr7.102006463.+	3'ss.2i	-7.95
chr7.102006419.+	3'ss.2i	-7.96
chr6.99382757.-	3'ss.2i	-7.95
chr6.58256571.-	3'ss.2i	-7.96
chr6.32610385.+	3'ss.2i	-7.96
chr6.32609085.+	3'ss.2i	-7.96
chr6.26368216.+	3'ss.2i	-7.95
chr6.170119016.-	3'ss.2i	-7.96
chr6.160913996.-	3'ss.2i	-7.96
chr6.160205101.-	3'ss.2i	-7.95
chr6.158571623.-	3'ss.2i	-7.96
chr6.150240462.-	3'ss.2i	-7.96
chr6.133108722.-	3'ss.2i	-7.95
chr6.122765418.-	5'ss.3i	-3.72
chr6.116544195.+	3'ss.2i	-7.96
chr6.112062185.-	5'ss.2e	-1.41
chr6.108214861.-	3'ss.2i	-7.96
chr5.96767446.+	3'ss.2i	-7.96
chr5.82357732.-	3'ss.2i	-7.95
chr5.74808774.+	5'ss.3i	-3.87
chr5.74808770.+	5'ss.2e	-3.87
chr5.74640068.+	3'ss.2i	-7.95
chr5.70341336.-	3'ss.2i	-7.96
chr5.69503574.-	3'ss.2i	-7.96
chr5.68565032.+	3'ss.2i	-7.96
chr5.68565032.+	5'ss.2e	-6.79
chr5.68535281.+	3'ss.2i	-7.95
chr5.6662927.+	3'ss.2i	-7.96
chr5.55272123.-	3'ss.2i	-7.96
chr5.55237649.-	3'ss.2i	-7.96
chr5.43292741.-	3'ss.2i	-7.96
chr5.34176064.-	3'ss.2i	-7.95
chr5.251451.+	3'ss.2i	-7.95
chr5.21491428.+	3'ss.2i	-7.96
chr5.21473464.+	3'ss.2i	-7.95
chr5.177022266.+	3'ss.2i	-7.95
chr5.176729833.-	3'ss.2i	-7.96
chr5.15616090.+	3'ss.2i	-7.96
chr5.150277748.-	3'ss.2i	-7.95
chr5.140027512.+	5'ss.3i	-2.51
chr5.137854558.-	3'ss.2i	-7.96
chr5.115176191.-	5'ss.3i	-2.25
chr4.99214554.+	3'ss.2i	-7.96
chr4.84390306.-	3'ss.2i	-7.95
chr4.75245163.+	3'ss.2i	-7.95
chr4.25161388.-	3'ss.2i	-7.95
chr4.21764657.-	3'ss.2i	-7.95
chr4.170563857.+	3'ss.2i	-7.95
chr4.166675951.+	3'ss.2i	-7.95
chr4.151936015.-	3'ss.2i	-7.96
chr4.15034783.+	3'ss.2i	-7.95
chr4.146026755.+	3'ss.2i	-7.95
chr4.120384049.+	3'ss.2i	-7.95
chr4.120381336.+	3'ss.2i	-7.95
chr4.119517065.+	3'ss.2i	-7.96
chr4.114892105.-	3'ss.2i	-7.96
chr4.109584461.+	3'ss.2i	-7.96
chr4.109584461.+	5'ss.2e	-3.66
chr3.9429772.-	3'ss.2i	-7.95
chr3.9429772.-	5'ss.2e	-1.68
chr3.57585895.+	5'ss.2e	-4.29
chr3.38541241.+	5'ss.3i	-2.81
chr3.33883387.+	3'ss.2i	-7.95
chr3.197025404.-	5'ss.3i	-3.29
chr3.196539088.+	3'ss.2i	-7.96
chr3.196539088.+	3'ss.1i	8.75
chr3.196032528.-	3'ss.2i	-7.96
chr3.196032528.-	5'ss.2e	-1.76
chr3.195709183.-	3'ss.2i	-7.95
chr3.183584555.-	3'ss.2i	-7.95
chr3.149367628.-	5'ss.2e	-7.44
chr3.141923056.-	5'ss.3i	-2.25
chr3.141622460.+	3'ss.2i	-7.96
chr3.132394659.+	3'ss.2i	-7.96
chr3.132394659.+	5'ss.2e	-3.48
chr3.122808013.+	3'ss.2i	-7.96
chr3.122808013.+	5'ss.2e	-4.71
chr3.114107954.-	3'ss.2i	-7.95
chr2.98287862.+	3'ss.2i	-7.96
chr2.97533665.-	3'ss.2i	-7.95
chr2.97462747.+	3'ss.2i	-7.95
chr2.88037235.+	3'ss.2i	-7.95
chr2.87127919.+	3'ss.2i	-7.95
chr2.75105813.+	3'ss.2i	-7.96
chr2.75101391.+	3'ss.2i	-7.96
chr2.75101391.+	5'ss.2e	-1.96
chr2.74434829.+	3'ss.2i	-7.96
chr2.73684458.+	5'ss.5i	4.17
chr2.69985306.+	3'ss.2i	-7.95
chr2.69985306.+	5'ss.2e	-1.76
chr2.65466984.+	3'ss.2i	-7.95
chr2.55555427.-	5'ss.3i	-1.15
chr2.46839485.-	3'ss.2i	-7.96
chr2.46819724.-	3'ss.2i	-7.95
chr2.3598064.-	3'ss.2i	-7.95
chr2.33820706.-	3'ss.2i	-7.95
chr2.32828603.+	5'ss.3i	-2.78
chr2.26424191.-	3'ss.2i	-7.96
chr22.41226962.-	3'ss.2i	-7.96
chr22.40797595.+	3'ss.2i	-7.96
chr22.38889778.-	3'ss.2i	-7.96
chr2.233589400.+	5'ss.2e	-0.54
chr2.231253272.+	3'ss.2i	-7.95
chr22.29763261.-	3'ss.2i	-7.95
chr22.25423910.+	3'ss.2i	-7.96
chr22.20113824.+	3'ss.2i	-7.96
chr2.219136102.+	3'ss.2i	-7.96
chr2.207971734.-	3'ss.2i	-7.95
chr21.9966382.-	3'ss.2i	-7.96
chr2.179303595.+	3'ss.2e	1.33
chr2.175541774.-	5'ss.2e	-0.56
chr2.175541773.-	5'ss.1e	2.41
chr2.160572042.+	3'ss.2i	-7.96
chr2.152671715.-	3'ss.2i	-7.95
chr2.152659840.-	3'ss.2i	-7.95
chr21.38537850.+	3'ss.2i	-7.95
chr21.35093578.+	5'ss.3i	-3.07
chr21.34901869.-	5'ss.4i	-1.12
chr21.32711739.-	3'ss.2i	-7.96
chr2.132277106.+	3'ss.2i	-7.95
chr2.132263883.+	3'ss.2i	-7.96
chr2.132258077.+	3'ss.2i	-7.95
chr2.130917209.-	3'ss.2i	-7.95
chr2.130911025.-	3'ss.2i	-7.95
chr2.112608489.-	3'ss.2i	-7.95
chr2.106006565.-	5'ss.2e	-5.11
chr20.60919035.-	3'ss.2e	1.32
chr20.59829880.+	3'ss.2i	-7.95
chr20.50705184.-	3'ss.2i	-7.96
chr20.46252653.+	3'ss.2i	-7.95
chr20.44466905.+	3'ss.2i	-7.96
chr20.42086999.+	3'ss.2i	-7.95
chr20.42086999.+	5'ss.2e	-1.28
chr20.34280214.-	5'ss.5i	4.17
chr20.34194463.-	3'ss.1i	8.75
chr20.34194463.-	5'ss.1e	7.12
chr20.17923053.-	3'ss.2i	-7.96
chr20.1350718.-	3'ss.2i	-7.95
chr19.9925014.-	3'ss.2e	-0.54
chr19.7506537.+	3'ss.2i	-7.95
chr19.5913703.+	5'ss.3i	-4.17
chr19.58367470.+	3'ss.2i	-7.96
chr19.58352204.+	3'ss.2i	-7.95
chr19.58004222.+	3'ss.2i	-7.96
chr19.58004222.+	5'ss.2e	-6.38
chr19.55550804.-	3'ss.2e	1.51
chr19.53910949.+	3'ss.2i	-7.95
chr19.53901194.+	3'ss.2i	-7.95
chr19.53854069.+	3'ss.2i	-7.96
chr19.52909766.+	3'ss.2i	-7.96
chr19.52819085.+	3'ss.2i	-7.96
chr19.52786536.+	3'ss.2i	-7.96
chr19.52562362.-	3'ss.2i	-7.95
chr19.52505163.-	3'ss.2i	-7.96
chr19.51306807.-	5'ss.3i	-1.32
chr19.50370476.-	3'ss.2i	-7.95
chr19.50025069.+	3'ss.2i	-7.95
chr19.50025069.+	5'ss.2e	-1.68
chr19.48235470.+	3'ss.2i	-7.96
chr19.48235470.+	5'ss.2e	-7.45
chr19.47920222.-	3'ss.2i	-7.96
chr19.47658369.+	3'ss.2i	-7.95
chr19.47252030.+	3'ss.2i	-7.95
chr19.45395648.+	3'ss.2i	-7.96
chr19.45174577.+	3'ss.2e	1.33
chr19.44677011.+	3'ss.2i	-7.96
chr19.44654564.+	3'ss.2i	-7.95
chr19.44586164.+	3'ss.2i	-7.96
chr19.44531548.+	3'ss.2i	-7.95
chr19.44513234.+	3'ss.2i	-7.96
chr19.40587826.-	3'ss.2i	-7.95
chr19.40553382.-	3'ss.2i	-7.96
chr19.38828380.+	3'ss.1e	1.54
chr19.36704155.-	5'ss.2e	-3.57
chr1.93624319.-	5'ss.5i	6.67
chr19.21216890.+	3'ss.2i	-7.96
chr19.2080572.-	5'ss.3i	-4.23
chr19.17388194.+	3'ss.2e	1.33
chr19.1602130.-	3'ss.2i	-7.95
chr19.14525701.-	3'ss.2i	-7.95
chr19.14525701.-	5'ss.2e	-7.31
chr19.14499512.+	3'ss.2i	-7.96
chr19.1031068.+	3'ss.2i	-7.96
chr1.89587668.-	3'ss.2i	-7.95
chr1.89587668.-	5'ss.2e	-4.01
chr1.89526009.-	3'ss.2i	-7.96
chr1.89481099.-	3'ss.2i	-7.96
chr18.57333305.-	5'ss.3i	-0.65
chr18.43689611.+	3'ss.2i	-7.95
chr18.43668225.-	3'ss.2i	-7.95
chr17.8079346.-	3'ss.2i	-7.96
chr17.80767582.+	3'ss.2i	-7.96
chr17.79527657.-	3'ss.2i	-7.95
chr17.79527657.-	5'ss.2e	-7.27
chr17.74041370.-	5'ss.3i	-2.86
chr17.72773880.+	5'ss.3i	-4.23
chr17.66110561.+	3'ss.2i	-7.95
chr17.65172787.-	3'ss.2i	-7.95
chr17.62516694.+	3'ss.1i	8.75
chr17.62516694.+	5'ss.1e	2.36
chr17.58286906.-	3'ss.2i	-7.95
chr17.58037531.-	3'ss.2i	-7.95
chr17.58037531.-	5'ss.2e	-0.91
chr17.57962116.-	3'ss.2e	1.33
chr17.4886989.-	5'ss.4i	-1.82
chr17.48749267.+	3'ss.2i	-7.95
chr17.45749077.+	3'ss.2e	1.33
chr17.45749074.+	3'ss.2i	-7.96
chr1.745552.-	3'ss.2i	-7.96
chr17.41276134.-	3'ss.2i	-7.96
chr17.40765095.+	5'ss.4i	-4.66
chr17.38567603.-	5'ss.3i	-2.81
chr17.37601661.-	5'ss.3i	-3.87
chr17.35837670.+	3'ss.1i	8.75
chr17.35837670.+	5'ss.1e	5.5
chr17.35837669.+	5'ss.2e	-2.26
chr17.35388661.+	3'ss.1i	8.75
chr17.30548208.+	5'ss.3i	-3.69
chr17.30479922.+	3'ss.2i	-7.95
chr17.30479922.+	5'ss.2e	-2.44
chr17.29070317.+	3'ss.2i	-7.95
chr17.17046868.+	3'ss.2i	-7.96
chr17.1587878.-	3'ss.2i	-7.95
chr17.15586473.-	3'ss.2i	-7.95
chr17.15580596.-	3'ss.2i	-7.95
chr16.89779490.-	3'ss.2i	-7.95
chr16.88012302.+	5'ss.4i	-0.88
chr16.74670807.-	5'ss.3i	-4.75
chr16.74372478.-	3'ss.2i	-7.95
chr16.72123985.-	5'ss.3i	-2.52
chr16.70176454.+	3'ss.2i	-7.95
chr16.68233696.+	3'ss.2i	-7.95
chr16.66861360.-	5'ss.3i	-3.18
chr16.56974318.+	5'ss.5i	4.17
chr16.56692983.+	3'ss.2i	-7.95
chr16.56678622.+	3'ss.1e	0.43
chr16.46713070.-	3'ss.2i	-7.95
chr16.31373930.+	3'ss.2i	-7.96
chr16.28856803.-	3'ss.2i	-7.95
chr16.23672489.+	3'ss.2i	-7.96
chr16.22493763.+	3'ss.2i	-7.95
chr16.22493763.+	5'ss.2e	-2.56
chr16.22490010.+	3'ss.2i	-7.95
chr16.22477516.+	3'ss.2i	-7.96
chr16.22470674.+	3'ss.2i	-7.95
chr16.22466769.+	3'ss.2i	-7.95
chr16.21490901.-	3'ss.2i	-7.95
chr16.21416616.-	3'ss.2i	-7.96
chr16.21416616.-	5'ss.2e	-3.21
chr16.18896486.-	3'ss.2i	-7.96
chr16.18883948.-	3'ss.2i	-7.95
chr16.18880627.-	3'ss.2i	-7.95
chr16.15123806.+	3'ss.2i	-7.95
chr16.15110975.+	3'ss.2i	-7.96
chr16.11943116.-	5'ss.2e	-4.96
chr16.11815293.-	3'ss.2i	-7.96
chr15.98526567.-	5'ss.2e	-7.45
chr15.84782377.+	3'ss.2i	-7.96
chr15.83298938.-	5'ss.2e	-3.67
chr15.82823395.-	3'ss.2i	-7.95
chr15.80423520.+	3'ss.2i	-7.96
chr15.79064173.-	3'ss.2i	-7.96
chr15.77653775.-	3'ss.2i	-7.95
chr15.75985576.-	3'ss.2i	-7.96
chr15.74885474.+	3'ss.2i	-7.96
chr15.66044968.-	3'ss.2i	-7.96
chr15.50763828.+	3'ss.2i	-7.96
chr15.45811619.+	3'ss.2e	1.39
chr15.45811459.+	3'ss.2i	-7.95
chr15.45807969.+	3'ss.2i	-7.95
chr15.45789482.+	5'ss.3i	-5.15
chr15.44893933.-	5'ss.4i	-4.44
chr15.44762776.+	5'ss.4i	-4.39
chr15.44698530.+	5'ss.3i	-1.51
chr15.43812837.+	3'ss.2i	-7.96
chr15.37039134.+	3'ss.2i	-7.95
chr15.35245082.-	5'ss.4i	-1.74
chr15.34681971.-	3'ss.2i	-7.95
chr15.34437694.-	3'ss.2i	-7.96
chr15.32912307.+	3'ss.2i	-7.96
chr15.30922904.+	3'ss.2i	-7.96
chr15.28900940.+	3'ss.2i	-7.95
chr15.28483920.-	3'ss.2i	-7.95
chr15.28459120.-	3'ss.2i	-7.95
chr1.52489248.-	3'ss.2i	-7.96
chr15.102512797.+	3'ss.2i	-7.96
chr15.102512797.+	5'ss.2e	-5.06
chr15.101828654.-	5'ss.1e	9.04
chr14.96728987.+	3'ss.2i	-7.95
chr14.75614442.-	3'ss.2i	-7.96
chr14.75614442.-	5'ss.2e	-4.47
chr14.71436715.+	3'ss.2i	-7.95
chr14.71436715.+	5'ss.2e	-3.66
chr14.64882355.+	3'ss.2i	-7.95
chr14.62034107.+	3'ss.2i	-7.95
chr1.46080975.+	3'ss.2i	-7.96
chr14.58757584.-	3'ss.2i	-7.95
chr14.58757581.-	3'ss.2e	1.33
chr14.57696601.-	3'ss.2i	-7.95
chr14.55167864.+	5'ss.5i	1.93
chr14.53329310.-	3'ss.2i	-7.95
chr1.44542423.+	3'ss.2e	-0.35
chr14.21841591.-	3'ss.2i	-7.96
chr14.21831310.-	3'ss.2i	-7.95
chr14.20919613.-	3'ss.2i	-7.96
chr14.20919613.-	5'ss.2e	-4.49
chr14.104027531.-	3'ss.2i	-7.95
chr14.102516406.+	3'ss.2i	-7.95
chr14.102516406.+	5'ss.2e	-4.81
chr1.40209494.+	3'ss.2i	-7.95
chr1.40014531.-	5'ss.3i	-2.4
chr13.99515388.-	3'ss.2i	-7.95
chr13.45926030.+	3'ss.2i	-7.95
chr13.45533711.-	3'ss.2i	-7.95
chr13.39952665.-	3'ss.2i	-7.96
chr13.25023957.-	3'ss.2i	-7.96
chr13.21437264.-	3'ss.2i	-7.95
chr13.19961881.+	3'ss.2i	-7.95
chr13.114287433.+	3'ss.2i	-7.95
chr13.114240087.+	3'ss.2i	-7.95
chr12.9812235.+	3'ss.2i	-7.96
chr12.9809515.+	3'ss.2i	-7.96
chr12.9580463.-	3'ss.2i	-7.95
chr12.9456569.+	3'ss.2i	-7.95
chr1.27745591.-	3'ss.2i	-7.95
chr1.27739223.-	3'ss.2i	-7.96
chr1.27739223.-	5'ss.2e	-4.3
chr12.76447132.-	3'ss.2i	-7.96
chr12.72287000.+	3'ss.2i	-7.95
chr12.66725428.+	5'ss.3i	-3.78
chr12.64833022.+	3'ss.2i	-7.96
chr12.64808685.+	3'ss.2i	-7.95
chr1.26135069.+	3'ss.2i	-7.96
chr1.26128612.+	5'ss.4i	-5.55
chr12.57024651.-	3'ss.2i	-7.95
chr12.56678926.-	5'ss.3i	-4.23
chr12.56667582.-	3'ss.2i	-7.96
chr12.56667582.-	5'ss.2e	-6.38
chr12.56548837.+	3'ss.2i	-7.95
chr12.56330205.+	3'ss.2i	-7.96
chr12.53662537.+	3'ss.2i	-7.95
chr1.243957562.-	5'ss.1e	8.25
chr1.243375268.-	3'ss.2i	-7.95
chr1.236689266.+	3'ss.2i	-7.95
chr1.23460173.-	3'ss.1i	8.75
chr12.31449980.-	3'ss.2i	-7.96
chr12.24430248.-	3'ss.2i	-7.96
chr12.24366353.-	3'ss.2i	-7.95
chr1.224191220.+	3'ss.2i	-7.95
chr1.224183595.+	3'ss.2i	-7.95
chr12.132420700.+	5'ss.3i	-1.94
chr1.21273831.-	3'ss.2i	-7.96
chr12.124132676.+	5'ss.3i	-4.53
chr12.121661062.+	3'ss.2e	1.32
chr12.120058709.+	5'ss.5i	2.19
chr12.109542899.+	3'ss.2i	-7.96
chr12.100676719.+	3'ss.2i	-7.96
chr12.100602666.+	5'ss.2e	-1.01
chr1.202391746.+	3'ss.2i	-7.95
chr11.9435800.+	3'ss.2i	-7.95
chr11.9435800.+	5'ss.2e	-4.77
chr11.93476185.+	3'ss.2e	-0.33
chr11.9321250.-	3'ss.2i	-7.96
chr1.182821366.+	3'ss.2i	-7.95
chr11.77630026.-	3'ss.2i	-7.95
chr1.1754492.-	3'ss.2i	-7.95
chr1.16959843.-	3'ss.2i	-7.95
chr1.16920250.-	3'ss.2i	-7.95
chr11.651159.-	5'ss.3i	-2.25
chr11.62340216.-	3'ss.2i	-7.96
chr11.62340216.-	3'ss.1i	8.75
chr11.62304041.-	3'ss.2i	-7.96
chr1.161720920.+	3'ss.2i	-7.95
chr1.1588950.-	3'ss.2i	-7.95
chr1.155730434.-	3'ss.2i	-7.95
chr1.155730434.-	5'ss.2e	-1.96
chr1.155719712.+	3'ss.2i	-7.95
chr1.155718189.+	3'ss.2i	-7.95
chr1.151318811.-	3'ss.2i	-7.96
chr1.151045636.+	5'ss.3i	-3.65
chr1.151045632.+	5'ss.2e	-1.82
chr1.149899615.-	5'ss.3i	-3.04
chr11.46397399.+	3'ss.2i	-7.95
chr1.1460618.+	3'ss.2i	-7.96
chr1.144952691.-	3'ss.2i	-7.95
chr1.144865931.-	3'ss.2i	-7.95
chr11.3744035.-	3'ss.2i	-7.95
chr1.1200212.-	3'ss.2i	-7.95
chr1.1200212.-	5'ss.2e	-7.45
chr11.18420346.+	3'ss.2e	1.32
chr1.117624448.+	3'ss.2i	-7.96
chr1.117484335.+	3'ss.2i	-7.96
chr11.16777916.+	5'ss.5i	4.17
chr11.130764566.-	3'ss.2i	-7.96
chr1.112002077.+	3'ss.2i	-7.95
chr11.118627998.-	3'ss.2i	-7.95
chr1.11089813.+	3'ss.2i	-7.95
chr1.110230790.+	3'ss.2i	-7.96
chr1.110199332.+	3'ss.2i	-7.96
chr1.110169346.+	3'ss.2i	-7.96
chr1.110169346.+	5'ss.2e	-5.29
chr11.100641072.+	3'ss.2i	-7.95
chr1.109496993.-	3'ss.2i	-7.95
chr1.109496993.-	5'ss.2e	-1.68
chr10.97664694.-	3'ss.2i	-7.95
chr10.97664694.-	3'ss.2e	1.25
chr10.96367668.+	3'ss.2e	1.33
chr10.95163832.-	3'ss.2i	-7.95
chr10.95163832.-	5'ss.2e	-6.5
chr10.94318552.-	5'ss.2e	-4.54
chr10.88598620.+	3'ss.2i	-7.96
chr10.82248971.+	3'ss.2i	-7.95
chr10.81564285.-	3'ss.2i	-7.95
chr10.74232776.-	5'ss.5i	4.17
chr10.52502673.+	3'ss.2i	-7.95
chr10.51892564.+	3'ss.2i	-7.96
chr10.51850534.+	3'ss.2i	-7.96
chr10.51607100.-	3'ss.2i	-7.95
chr10.51387651.+	3'ss.2i	-7.95
chr10.43316380.+	3'ss.2i	-7.95
chr10.43016577.-	3'ss.2i	-7.96
chr10.38406316.+	3'ss.2i	-7.96
chr10.38306217.+	3'ss.2i	-7.95
chr10.31670762.+	5'ss.4i	-3.74
chr10.24884974.-	3'ss.2i	-7.95
chr10.16795001.-	3'ss.2i	-7.95
chr10.14876217.-	5'ss.2e	-3.49
chr10.116710851.+	3'ss.2i	-7.96
chr10.112362581.+	3'ss.2i	-7.96
chr10.101503792.+	3'ss.2i	-7.96
