# Supplementary material for: RNA editing in nascent RNA affects pre-mRNA splicing
Source: Genome Res. 2018 Jun;28(6):812–23. doi: 10.1101/gr.231209.117 (PMC5991522; doi:10.1101/gr.231209.117)
Supplement: Supplemental Material [file supp_gr.231209.117_Supplemental_Table_S6.xlsx]

## Sheet: Table S6
Supplemental Table S6. Primers for minigene and RT-PCR experiments
Name	Sequence	Note
FBXL4-fwd-E	ctcgaattctcactttgtgagatagcatg	The primer pair used for cloning FBXL4 into the minigene
FBXL4-rev-s	tatccgcggACAAGTTAAGAGAGAAGAGG
FBXL4G-fwd	tctgcttttGgATTTTTCTTCCTGGC	The primer pair used for mutate FBXL4 editing site A to G
FBXL4G-rev	GAAAAATCCAAAAGCAGAGCAAAAATC
DENND4A-fwd-H	gagaagcttgaagttacattctcttagcc	The primer pair used for cloning DENND4A into the minigene
DENND4A-rev-s	tatccgcggTGAGGCAATGAAAGCAGAGG
DENND4AG-fwd	aaatttatttttGgGGTTTTATATGACTGG	The primer pair used for mutate DENND4A editing site A to G
DENND4AG-rev	ATAAAACCCCAAAAATAAATTTTTAAAAATAAATACAC
PARP4-fwd-H	gagaagcttctttgctagagtgagagttg	The primer pair used for cloning PARP4 into the minigene
PARP4-rev-s	tatccgcggGTGCCTGTAGTACCAGCTAG
PARP4G-fwd	atgtgatcGgTTCTACAGCAAATCG	The primer pair used for mutate PARP4 editing site A to G
PARP4G-rev	CTGTAGAACCGATCACATTTCACATGT
PDE4DIP-fwd-H	gagaagcttaggcagaactacgtctgatg	The primer pair used for cloning PDE4DIP into the minigene
PDE4DIP-rev-s	tatccgcggGAGGCAGAGGGATGGCAC
PDE4DIP-fwd	ttctgggacGgGATCCACTTCTAACT	The primer pair used for mutate PDE4DIP editing site A to G
PDE4DIP-rev	GTGGATCCCGTCCCAGAAAGTAGACA
RAP1GDS1-fwd-H	gagaagcttagcagtactttgatgtgaag	The primer pair used for cloning RAP1GDS1 into the minigene
RAP1GDS1-rev-s	tatccgcggGACTTCTAATGGTTCCTTCC
RAP1GDS1G-fwd	ttttctttaGgCAGATAATCTCAGTG	The primer pair used for mutate RAP1GDS1 editing site A to G
RAP1GDS1G-rev	TTATCTGCCTAAAGAAAAAAAAAAATCAGAAAC
ENTPD1AS1-fwd-H	gagaagcttcatattaacaatcacgaactc	The primer pair used for cloning ENTPD1AS1 into the minigene
ENTPD1AS1-rev-s	tatccgcggAGGTGGGAGAAGAATGGTAG
ENTPD1AS1G-fwd	ctttcagcGgCTGGCTTGGCTTTTTC	The primer pair used for mutate ENTPD1AS1 editing site A to G
ENTPD1AS1G-rev	AAGCCAGCCGCTGAAAGTACAAGGTC
Gexon-F1	AGTGCTTCAGCCGCTACCC	The primer pair used for minigene RT-PCR (long PCR production for FBXL4,DENND4A,PDE4DIP,PARP4)
Gexon-Rv	GTTGTACTCCAGCTTGTGCC
Gexon-F2	GCCATGCCCGAAGGCTAC	The primer pair used for minigene RT-PCR (short PCR production for PDE4DIP,RAP1GDS1,ENTPD1AS1)
RAP1GDS1-rv	TATCTTCAGCTTCTTCAAGG
ENTPD1AS1-rv	GAGAGTCTCTGTTTCCTCTG
PDE4DIP-rv	TGAGGACTCTGTTCTCATTG
RFWD3-fwd	GAAGTGGCAGTTGGCGTAG	The primer pair used for endogenous RFWD RT-PCR
RFWD3-rev	TCGGCATGATTTAACTGCAC
LIPT1-fwd	TCGTATGACGCACTTTTCCAG	The primer pair used for endogenous LIPT1 RT-PCR
LIPT1-rev	GCGCCTGTAATCTCAGCTACTC
EP400NL-fwd	GGGTCCTGCTCCTGACAAGG	The primer pair used for endogenous EP400NL RT-PCR
EP400NL-rev	GGTTGCAGTAAGCCGACATTG
c17orf67-fwd	ACAAGGGACCAAAGGAACAG	The primer pair used for endogenous c17orf67 RT-PCR
c17orf67-rev	TGCTGGGAACCTTCACATATC
FBXL4-fwd	TTGTGCCGCATCTAGAGAGTC	The primer pair used for endogenous FBXL4 RT-PCR
FBXL4-rev	CCAGGTACCCTGAACTTTGC
DENND4A-fwd	TTACCCCAACTGGATTGTCAG	The primer pair used for endogenous DENND4A RT-PCR
DENND4A-rev	TACAGTGTTCGTCTTTGCCAC
PARP4-fwd	AGGTTATTCGCCTGCGGTATC	The primer pair used for endogenous PARP4 RT-PCR
PARP4-rev	CCTTAAGACGTGACGATTTG
PDE4DIP-fwd	GAACACCGGCTGACCTCTAC	The primer pair used for endogenous PDE4DIP RT-PCR
PDE4DIP-rev-A3SS	CTTCGATTGTCTTCCCTGAGGAC
RAP1GDS1-fwd	TCACCCTCGGGGAGCAACATG	The primer pair used for endogenous RAP1GDS1 RT-PCR
RAP1GDS1-rev-A3SS	CAGCTTCTTCAAGGTATCACTGAG
