# Supplementary material for: RNA editing in nascent RNA affects pre-mRNA splicing
Source: HighWire-hosted journal article supplement (doi:10.1101/gr.231209.117), 2018-05-03
Supplement: Supplemental_Fig_S1.pdf [file Supplemental_Fig_S1.pdf]

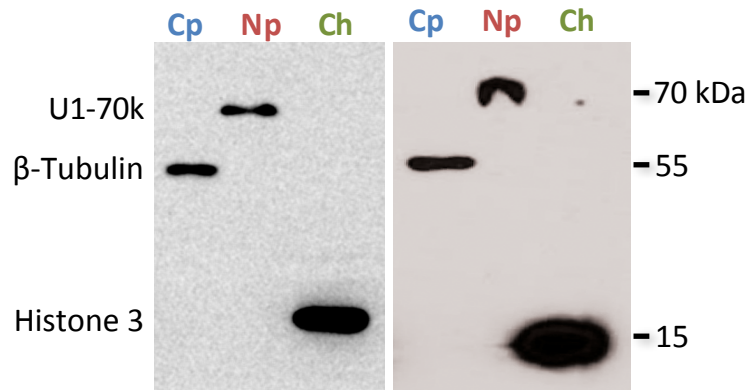

Supplemental Fig S1. U87MG subcellular fractionation validated by Western blotting using the antibody specific to the marker protein of each fraction:  $\beta$ -tubulin for cytoplasm (Cp), U1-70k for nucleoplasm (Np), and Histone 3 for chromatin (Ch).
