# Supplementary material for: RNA editing in nascent RNA affects pre-mRNA splicing
Source: HighWire-hosted journal article supplement (doi:10.1101/gr.231209.117), 2018-05-03
Supplement: Supplemental_Fig_S2.pdf [file Supplemental_Fig_S2.pdf]

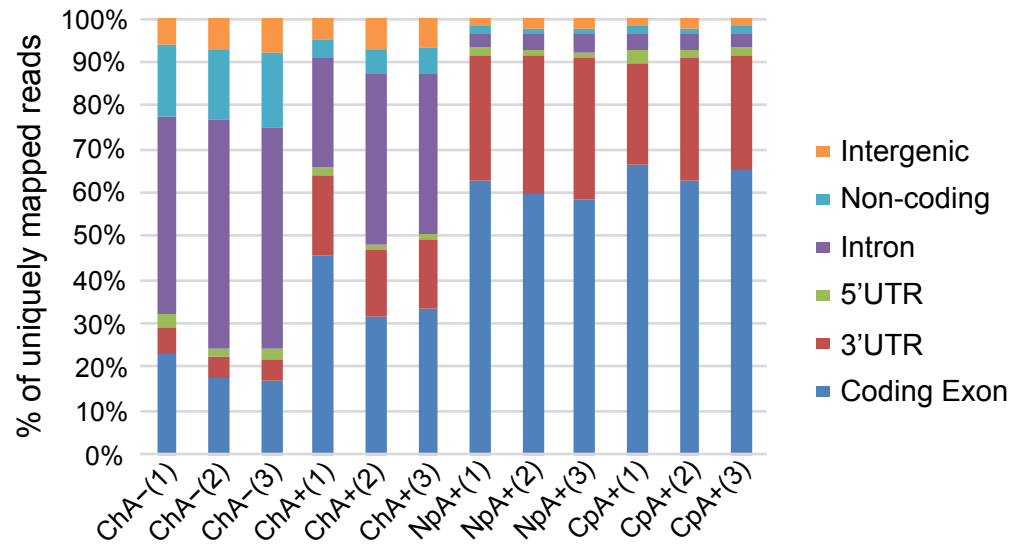

Supplemental Fig S2. Genomic context of uniquely mapped reads. Percentage of uniquely mapped reads for different genomic regions are shown for triplicates of each subcellular fraction. Replicates are named as, for example, ChA-(1), ChA-(2), ChA-(3).
