# Supplementary material for: RNA editing in nascent RNA affects pre-mRNA splicing
Source: HighWire-hosted journal article supplement (doi:10.1101/gr.231209.117), 2018-05-03
Supplement: Supplemental_Fig_S5.pdf [file Supplemental_Fig_S5.pdf]

A

**HepG2**

Groups ■ 1 ■ 2 ■ 3

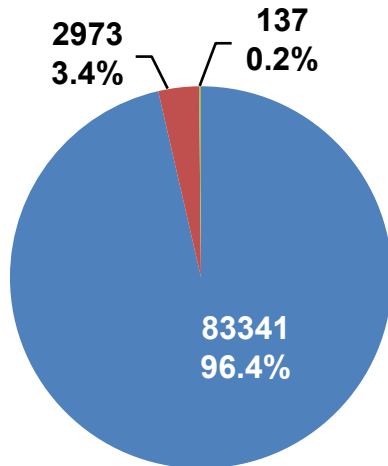

B

**K562**

Groups ■ 1 ■ 2 ■ 3

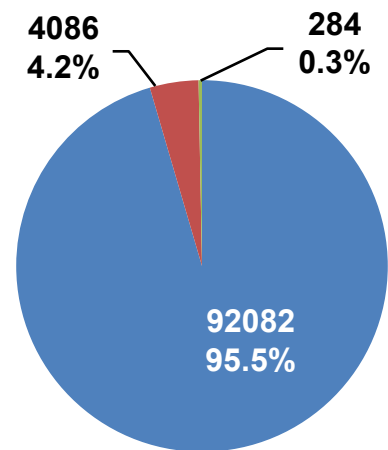

C

**K562 nuclear fractions**

Groups ■ 1 ■ 2 ■ 3

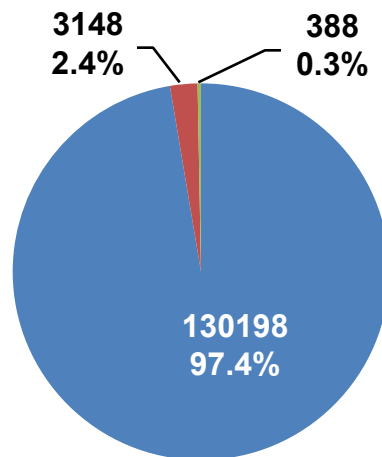

Supplemental Fig S5. Editing kinetic groups of A-to-I editing sites in (A) HepG2 and (B) K562 cells, obtained using cellular fractionation NA-, NA+, and CA+ RNA-seq data by the ENCODE consortium. See Methods for definition of groups. (C) Editing kinetic groups of A-to-I editing sites in K562 cells, obtained using nuclear fractionations (chromatin and nucleoplasmic) and CA+ RNA-seq data by the ENCODE consortium. Grouping was defined similarly as for U87MG data.
