# Supplementary material for: RNA editing in nascent RNA affects pre-mRNA splicing
Source: HighWire-hosted journal article supplement (doi:10.1101/gr.231209.117), 2018-05-03
Supplement: Supplemental_Fig_S6.pdf [file Supplemental_Fig_S6.pdf]

Groups    ■ Early    ■ Intermediate    ■ Late

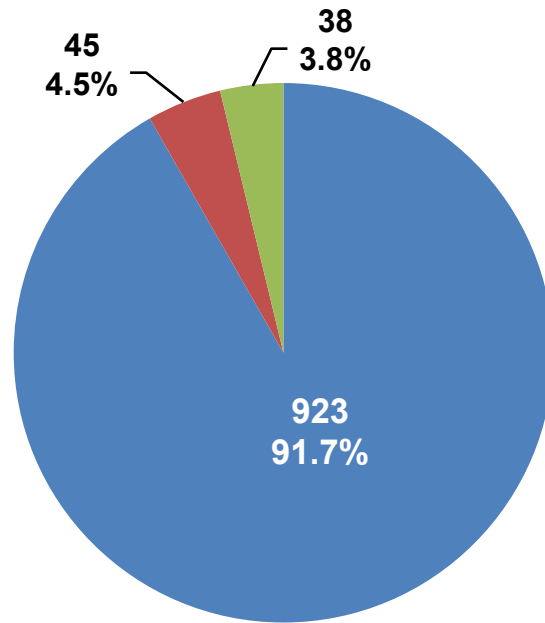

Supplemental Fig S6. Editing kinetic groups of A-to-I editing sites in mouse dendritic cells, obtained using time-course 4sU-labeled RNA-Seq data sets. See Methods for details.
