# Supplementary material for: RNA editing in nascent RNA affects pre-mRNA splicing
Source: HighWire-hosted journal article supplement (doi:10.1101/gr.231209.117), 2018-05-03
Supplement: Supplemental_Fig_S7.pdf [file Supplemental_Fig_S7.pdf]

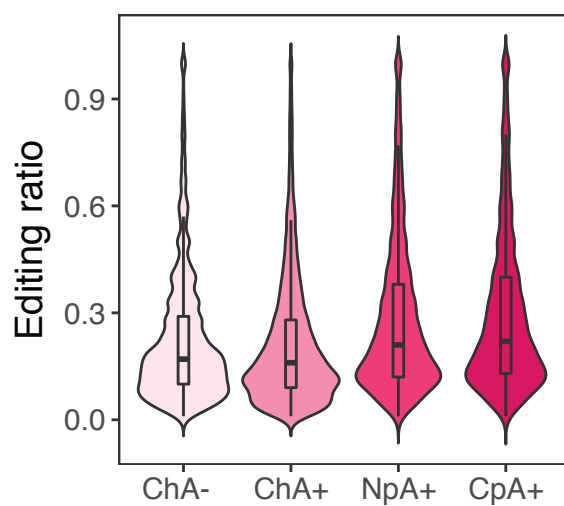

Supplemental Fig S7. Related to Fig. 1D. Editing ratio distribution of the editing sites in Fig. 1C (union of all four kinetic groups) in each subcellular fraction, excluding those that were in the introns.
