# Supplementary material for: RNA editing in nascent RNA affects pre-mRNA splicing
Source: HighWire-hosted journal article supplement (doi:10.1101/gr.231209.117), 2018-05-03
Supplement: Supplemental_Fig_S12.pdf [file Supplemental_Fig_S12.pdf]

A

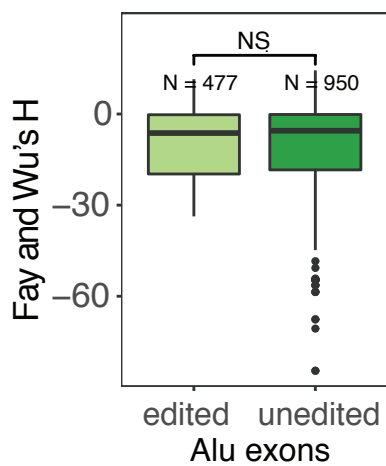

B

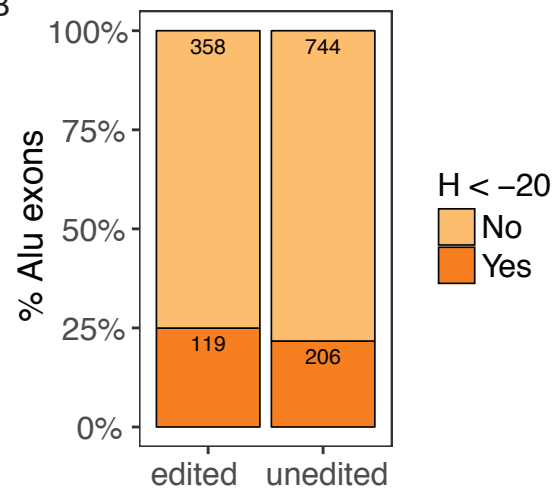

Supplemental Fig S12. (A) Distribution of H values in edited and unedited Alu exons. The editing sites can be anywhere in the Alu exons. N: number of exons. NS:  $P > 0.05$ , Wilcoxon rank sum test. (B) Proportions of Alu exons with  $H < -20$ , which previous literature used to define positively selected regions (Pandey et al. 2016), vs. otherwise. There was no significant difference in the number of exons with  $H < -20$  (Fisher's exact test,  $P = 0.18$ ). The number in the bars represent the number of exons.
